# Supplementary material for: Mo2B, an MBene member with high electrical and thermal conductivities, and satisfactory performances in lithium ion batteries
Source: PubMed Central journal article supplement — Nanoscale Adv. 2019 Nov 12;2(1):347–55. doi: 10.1039/c9na00610a (PMC9417839; doi:10.1039/c9na00610a), 2019-11-12
Supplement: NA-002-C9NA00610A-s001.pdf [file NA-002-C9NA00610A-s001.pdf]

## **Mo<sub>2</sub>B, a MBene member with high electrical and thermal conductivities, and satisfactory performances in lithium ion batteries**

Xian-Hu Zha<sup>\*,a</sup>, Pengxiang Xu<sup>a</sup>, Qing Huang<sup>b</sup>, Shiyu Du<sup>\*,b</sup>, Rui-Qin Zhang<sup>c</sup>

<sup>a</sup>*Center for Quantum Computing, Peng Cheng Laboratory, Shenzhen, 518055, China*

<sup>b</sup>*Engineering Laboratory of Advanced Energy Materials, Ningbo Institute of Materials Technology and Engineering, Chinese Academy of Sciences, Ningbo, Zhejiang, 315201, China*

<sup>c</sup>*Department of Physics, City University of Hong Kong –Hong Kong SAR, China*

\*Email: zhaxh@pcl.ac.cn; dushiyu@nimte.ac.cn.

The specific heat is calculated according to the following equation:

$$c = \frac{1}{N_k M} \sum_{s,k} k_B \left( \frac{\hbar \omega_{s,k}}{k_B T} \right)^2 \frac{\exp(\hbar \omega_{s,k} / k_B T)}{[\exp(\hbar \omega_{s,k} / k_B T) - 1]^2} \quad \text{MERGEFORMAT} \quad \text{S1}$$

MERGEFORMAT (S1),

Here,  $N_k$  and  $M$  denote the number of k-points adopted, and the mass of the Mo<sub>2</sub>B unitcell, respectively.  $k_B$  and  $\hbar$  are the Boltzmann's and the reduced Plank's constants, respectively.  $T$  represents temperature.  $\omega_{s,k}$  is the circular phonon frequency of  $s$  branch at  $k$  point.

The thermal expansion coefficient is calculated according to the Grüneisen approximation. The detailed equation is as follows:

$$\alpha = \frac{1}{N_k} \frac{1}{a_0^2} \frac{\partial^2 E}{\partial a^2} \Big|_0 \sum_{s,k} c(s,k) \gamma(s,k) \quad \text{MERGEFORMAT} \quad \text{S2}$$

(S2),

where  $a_0$  is the optimal lattice parameter,  $E$  denotes the total energy of the configuration investigated.  $\gamma(s,k)$  represents the Grüneisen parameter, which is

$$\text{calculated as } \gamma(s,k) = \frac{-a_0}{\omega_{0,s,k}} \frac{\partial \omega_{s,k}}{\partial a}.$$

The phonon thermal conductivity is calculated according to the Klemens's theory:

$$\kappa_p = \frac{\rho}{T} \sum_s \frac{\langle v_s \rangle^4}{\langle \gamma_s^2 \rangle} \frac{1}{\omega_{\max,s}} \ln \frac{\omega_{\max,s}}{\omega_{\min,s}} \quad \text{MERGEFORMAT} \quad \text{S3}$$

(S3),

where  $\rho$  is the mass density,  $v_s$  and  $\gamma_s$  are the group velocity and Grüneisen parameter of branch  $s$ .  $\omega_{\max,s}$  and  $\omega_{\min,s}$  are the maximum and minimum circular phonon frequency of branch  $s$ .

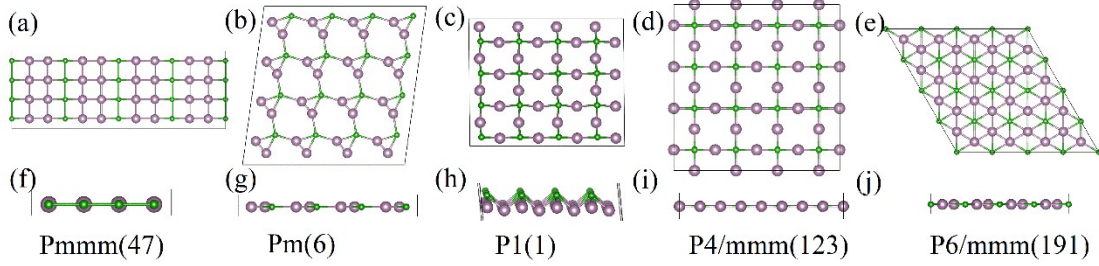

Figure S1. Some metastable two-dimensional molybdenum borides with the ratio of molybdenum to boron is 2:1, predicted from a combination of the CALYPSO and VASP codes.

Table S1. Relative total energies  $\Delta E$  (in eV) between the unit cells of the metastable configurations presented in Figure S1 and the H- and T-type  $\text{Mo}_2\text{B}$ . The space group is adopted to differentiate these structures, and 187 and 164 denote the H- and T-type  $\text{Mo}_2\text{B}$ , respectively.

| Space group | 47   | 6    | 1    | 123  | 191  | 187    | 164   |
|-------------|------|------|------|------|------|--------|-------|
| $\Delta E$  | 4.91 | 4.20 | 2.51 | 5.17 | 3.59 | 0.0525 | 0.000 |

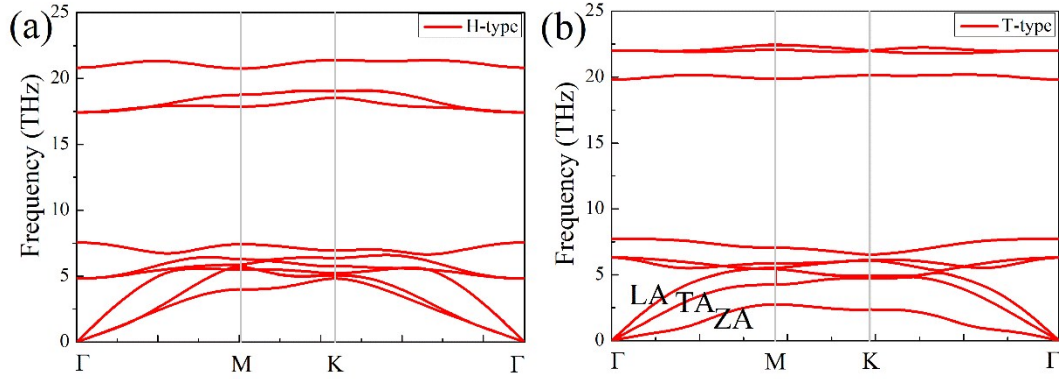

Figure S1. The phonon dispersions of the (a) H-type and (b) T-type  $\text{Mo}_2\text{B}$ .

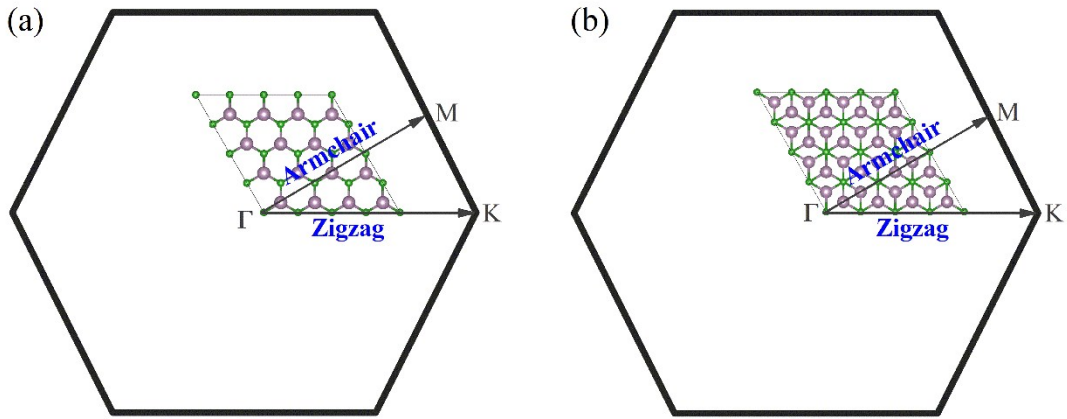

Figure S2. The Brillouin zones (BZs) for the H- and T-type Mo<sub>2</sub>B, where the high-symmetry directions  $\Gamma$ M and  $\Gamma$ K respectively correspond to the armchair and zigzag directions in both the H- and T-type configurations.

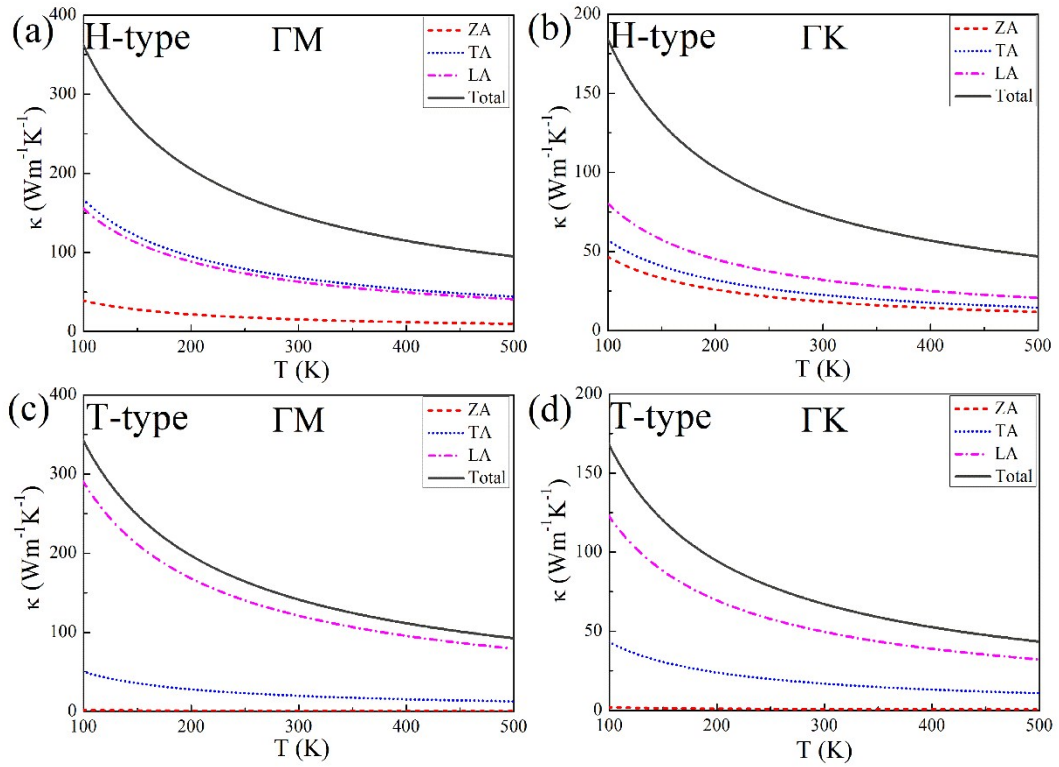

Figure S3. Based on a 5  $\mu$ m flake length, (a) and (b) respectively shows the phonon thermal conductivity along the armchair ( $\Gamma$ M) and zigzag ( $\Gamma$ K) direction of the H-type Mo<sub>2</sub>B. (c) and (d) respectively shows the corresponding value along the armchair and zigzag direction of the T-type Mo<sub>2</sub>B.

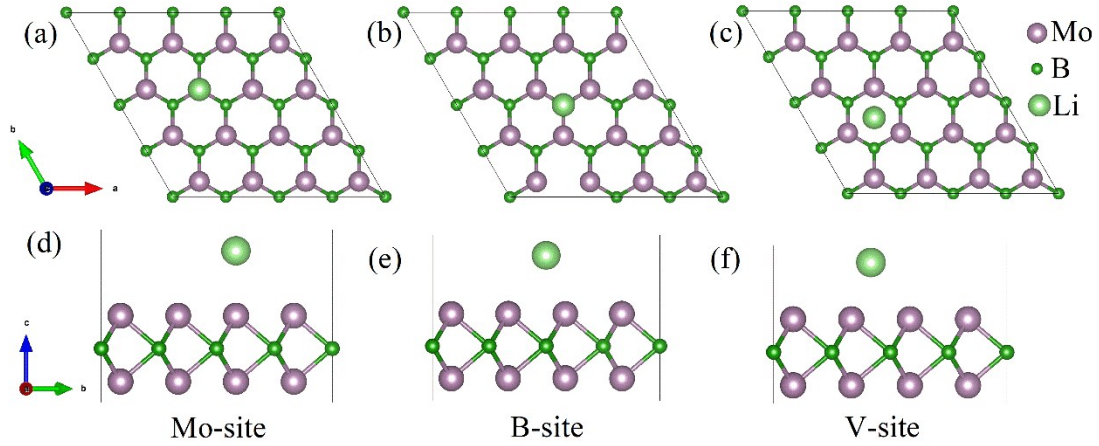

Figure S4. (a) and (d) respectively show the top-view and side-view of the H-type  $\text{Mo}_2\text{B}$  with one Li atom on the top-site of the Mo atom, and this configuration is denoted as “Mo-site”; (b) and (e) are the top-view and side-view of the H-type  $\text{Mo}_2\text{B}$  with one Li atom on the top-site of the middle boron atom, the configuration of which is denoted as “B-site”. (c) and (f) respectively present the top-site and side-view of the H-type  $\text{Mo}_2\text{B}$  with one Li atom on the top-site of the hexagonal center, and the structure is represented as “V-site”.

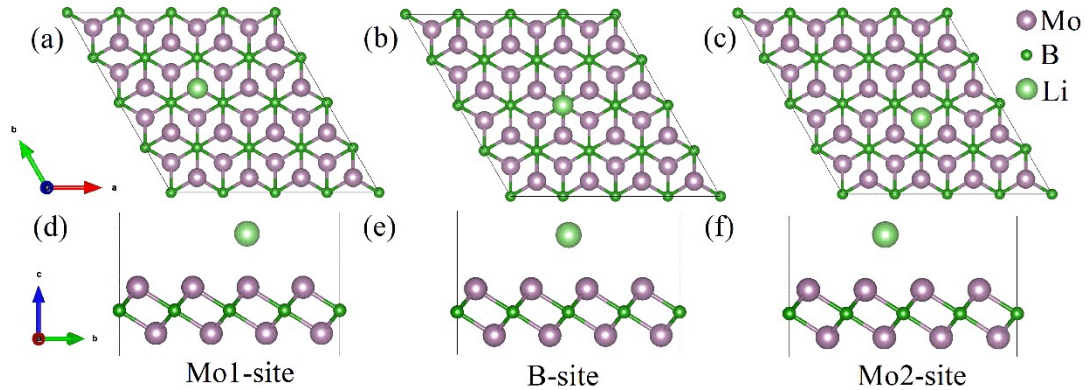

Figure S5. (a) and (d) are respectively the top-view and side-view of the T-type  $\text{Mo}_2\text{B}$  with one Li atom on the top-site of the neighboring Mo atom, and the structure is denoted as “Mo1-site”; (b) and (e) are respectively the top-view and side-view of the T-type  $\text{Mo}_2\text{B}$  with one Li atom on the top-site of the middle boron atom, which is named as “B-site”; (c) and (f) respectively shows the top-view and side-view of the T-type  $\text{Mo}_2\text{B}$  with one Li atom on the top-site of the bottom Mo atom, and this structure is denoted as “Mo2-site”.

Table S2. The relative total energies (in eV) for one Li atom on different sites of both the H- and T-type  $\text{Mo}_2\text{B}$ .

|        |          |        |          |
|--------|----------|--------|----------|
| H-type | Mo-site  | B-site | V-site   |
|        | 0.0263   | 0.128  | 0.000    |
| T-type | Mo1-site | B-site | Mo2-site |
|        | 0.0198   | 0.0125 | 0.000    |

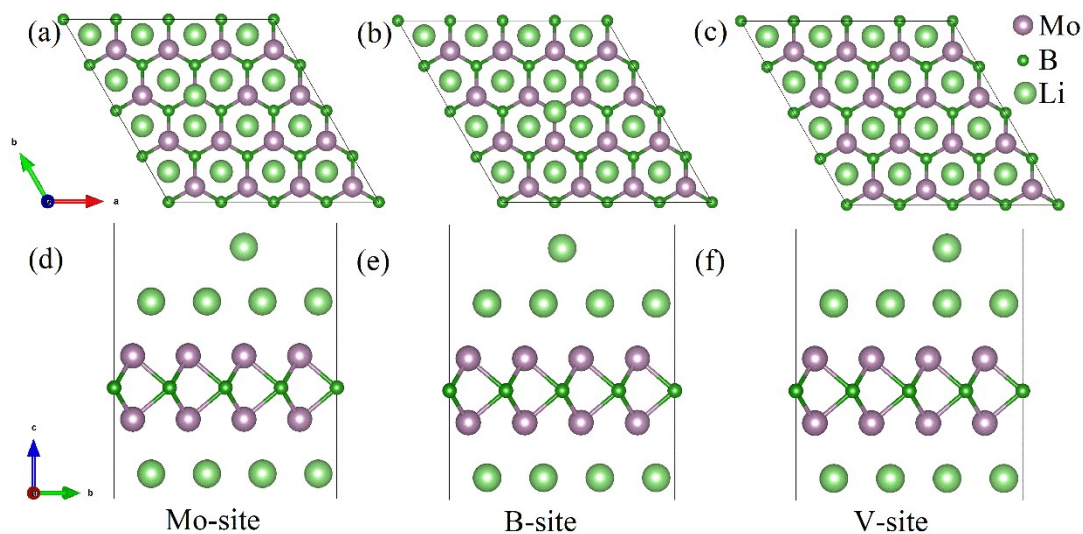

Figure S6. (a) and (d) respectively show the top-view and side-view of the H-type  $\text{Mo}_2\text{B}$  with thirty-three Li atoms, and the thirty-three Li atom is on the top-site of the Mo atom, and this configuration is denoted as “Mo-site”; (b) and (e) are the top-view and side-view of the H-type  $\text{Mo}_2\text{B}$  with thirty-three Li atoms, with the thirty-three Li atom on the top-site of the middle boron atom, and which structure is denoted as “B-site”. (c) and (f) respectively present the top-view and side-view of the H-type  $\text{Mo}_2\text{B}$  with thirty-three Li atoms, and the thirty-three Li atom is on the top-site of the hexagonal center, and the structure is represented as “V-site”.

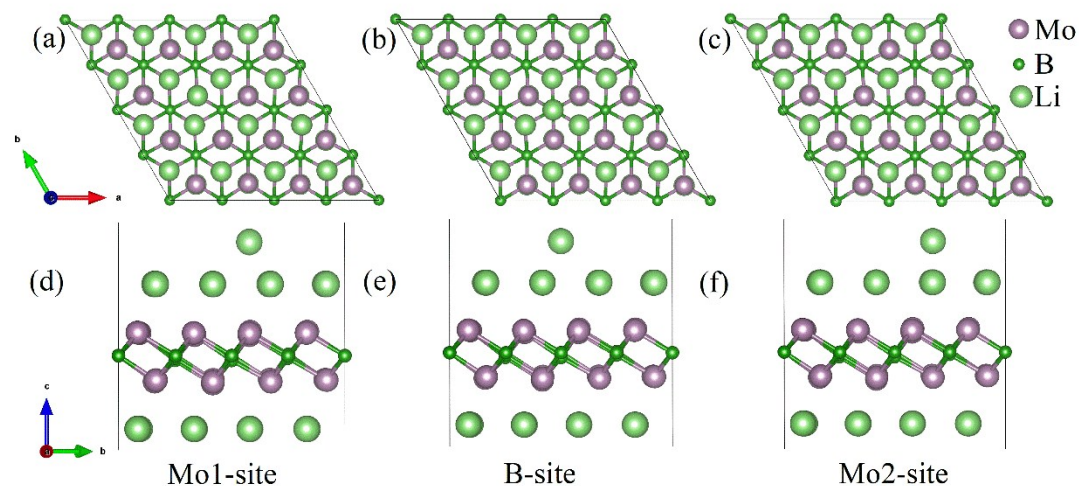

Figure S7. (a) and (d) respectively show the top-view and side-view of the T-type  $\text{Mo}_2\text{B}$  with thirty-three Li atoms, and the thirty-three Li atom is on the top-site of the top Mo atom, and this configuration is denoted as “Mo1-site”; (b) and (e) are the top-view and side-view of the T-type  $\text{Mo}_2\text{B}$  with thirty-three Li atoms, with the thirty-three Li atom on the top-site of the middle boron atom, and which structure is denoted as “B-site”. (c) and (f) respectively present the top-view and side-view of the T-type  $\text{Mo}_2\text{B}$  with thirty-three Li atoms, and the thirty-three Li atom is on the top-site of the bottom Mo atom, and the structure is represented as “Mo2-site”.

Table S3. The relative total energies (in eV) for the thirty-three Li atom on different sites of both

the H- and T-type Mo<sub>2</sub>B.

|        |          |         |          |
|--------|----------|---------|----------|
| H-type | Mo-site  | B-site  | V-site   |
|        | 0.000    | 0.00835 | 0.00852  |
| T-type | Mo1-site | B-site  | Mo2-site |
|        | 0.000    | 0.00648 | 0.0326   |
